# Supplementary material for: Prognostic and immunological role of FDX1 in pan-cancer: an in-silico analysis
Source: Springer Nature journal article supplement (doi:10.1038/s41598-023-34752-1), 2023-05-16
Supplement: MOESM1 [file 41598_2023_34752_MOESM1_ESM.pdf]

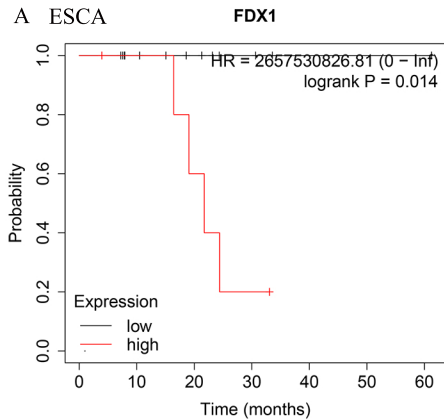

|      | 0  | 10 | 20 | 30 | 40 | 50 | 60 |
|------|----|----|----|----|----|----|----|
| low  | 13 | 9  | 6  | 3  | 1  | 1  | 1  |
| high | 6  | 5  | 3  | 1  | 0  | 0  | 0  |

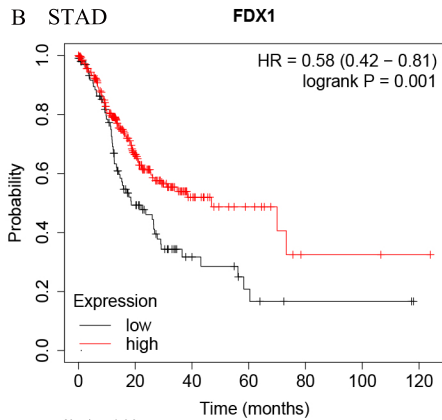

|      | 0   | 20 | 40 | 60 | 80 | 100 | 120 |
|------|-----|----|----|----|----|-----|-----|
| low  | 102 | 36 | 11 | 5  | 2  | 2   | 0   |
| high | 269 | 98 | 24 | 10 | 2  | 2   | 1   |

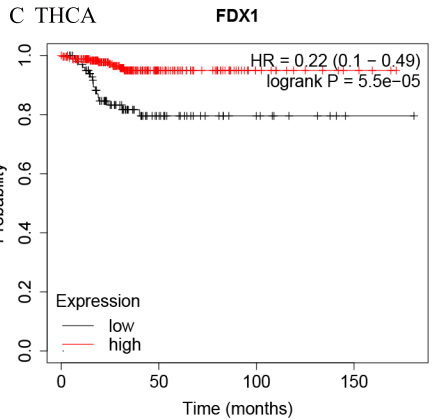

|      | 0   | 50 | 100 | 150 |
|------|-----|----|-----|-----|
| low  | 104 | 28 | 9   | 1   |
| high | 249 | 62 | 14  | 4   |
